# Supplementary material for: Neutrophil extracellular traps promote invasion and metastasis via NLRP3-mediated oral squamous cell carcinoma pyroptosis inhibition
Source: PubMed Central journal article supplement (PMC11066066; doi:10.1038/s41420-024-01982-9), 2024-05-02

**Figure 3C-Cal27**

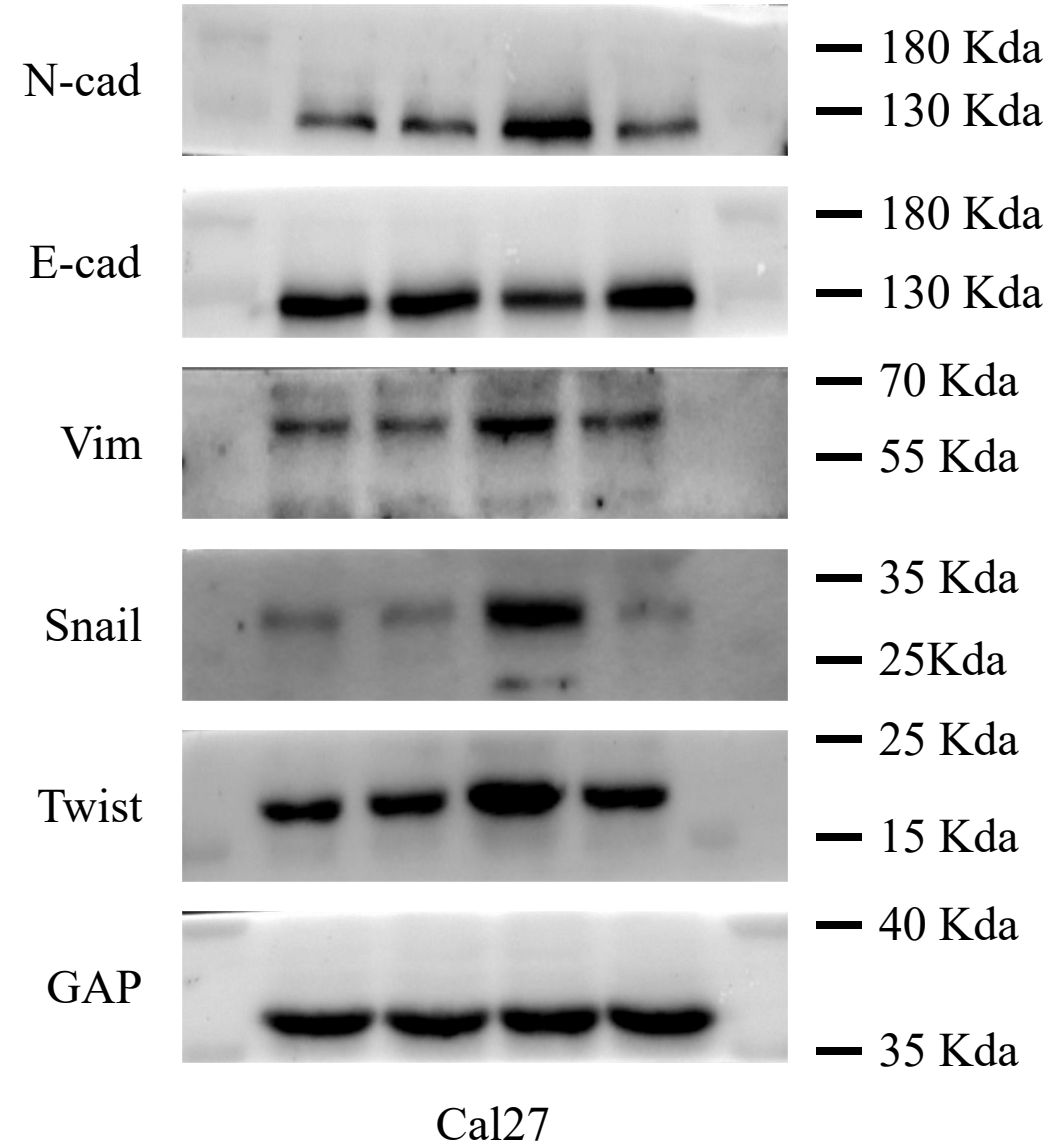

**Figure 3C-HN6**

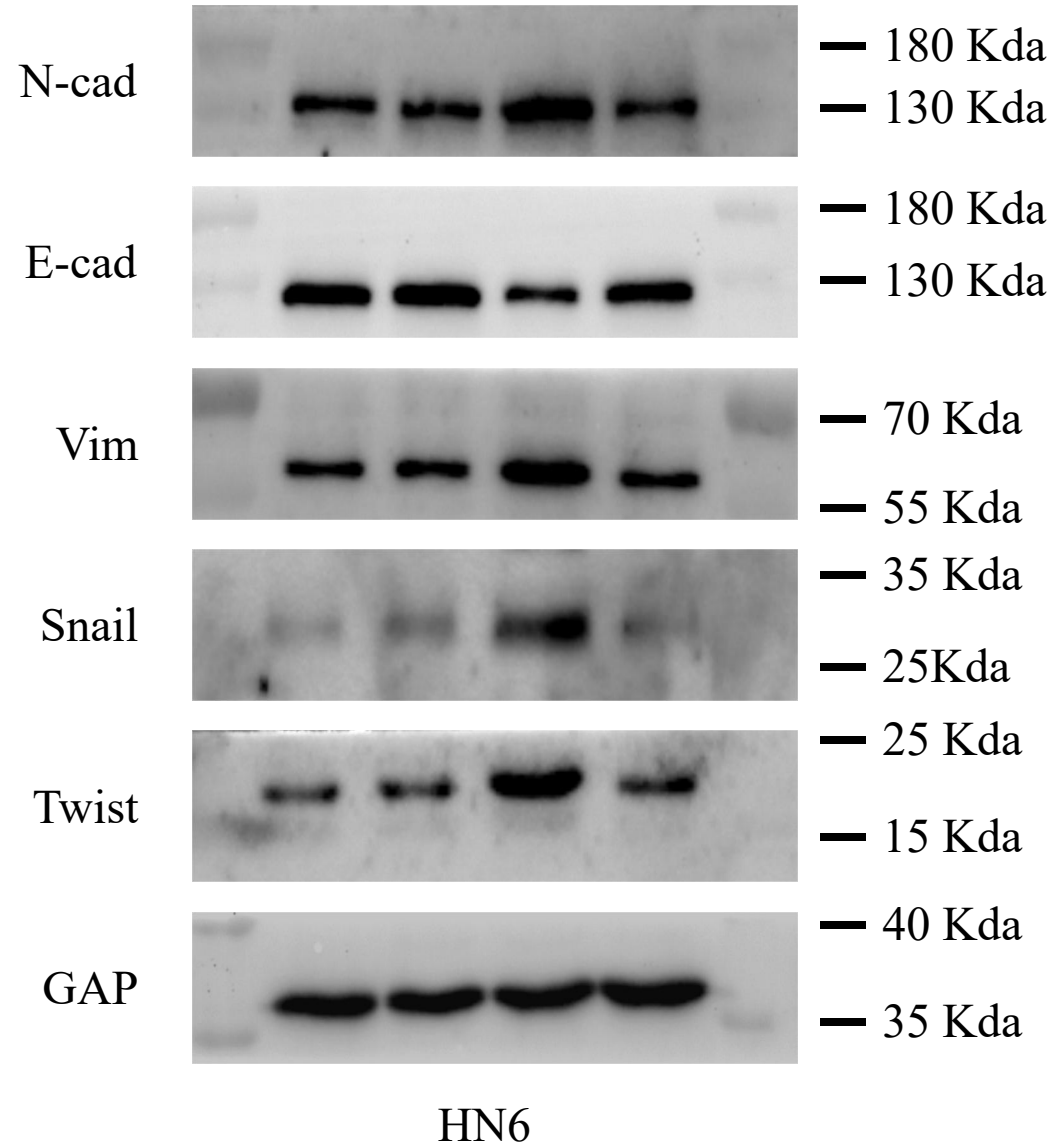

**Figure 5C**

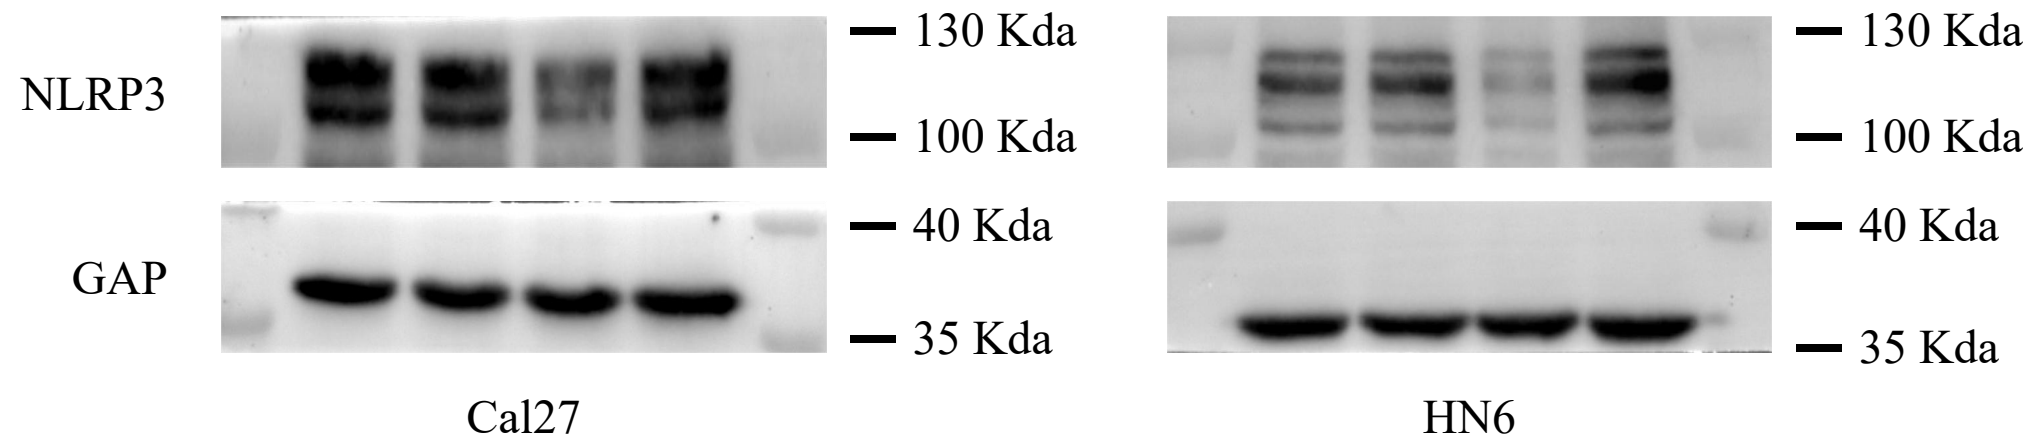

**Figure 5D**

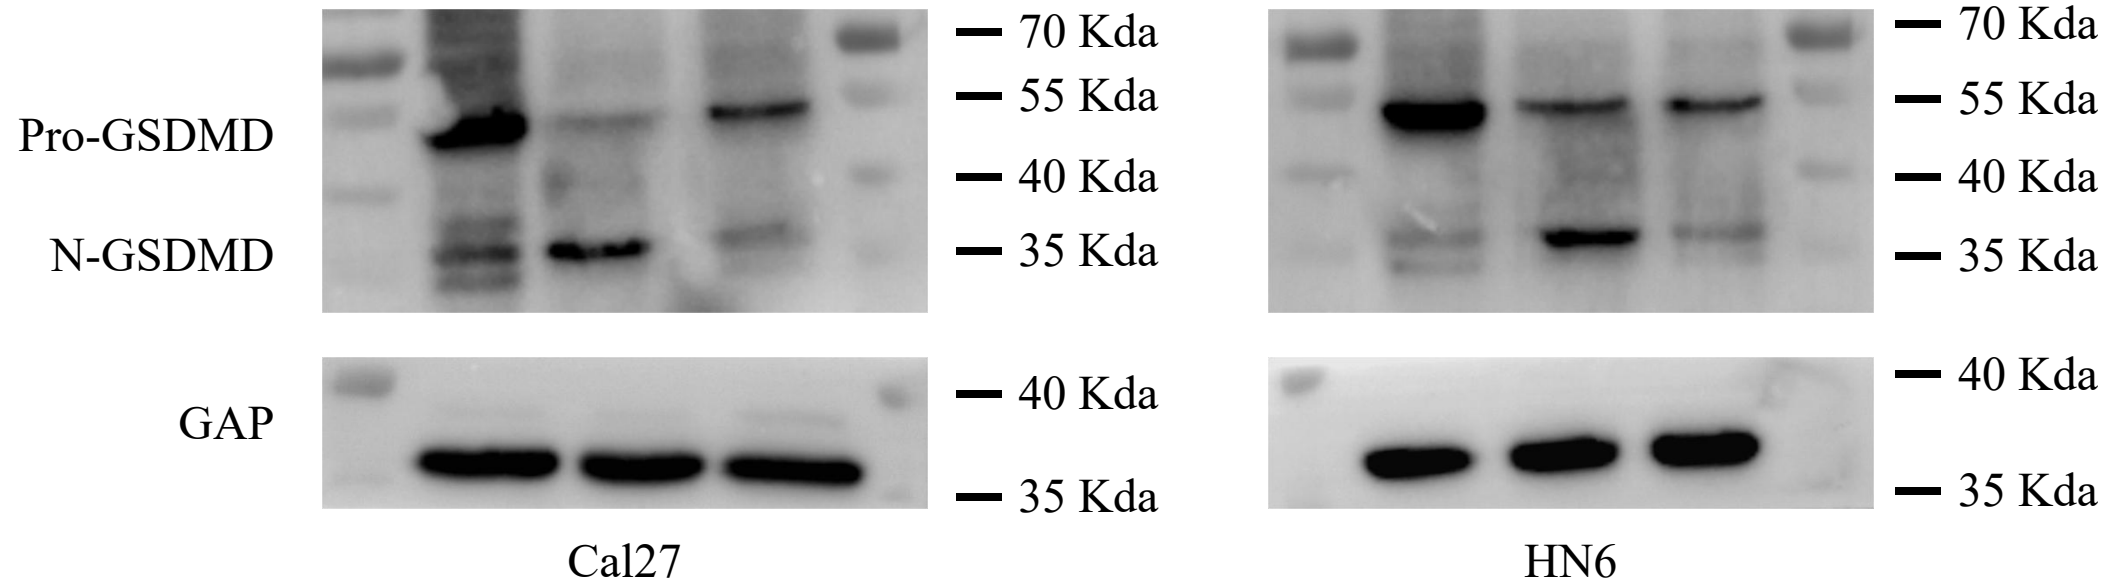

**Figure 6A-Cal27**

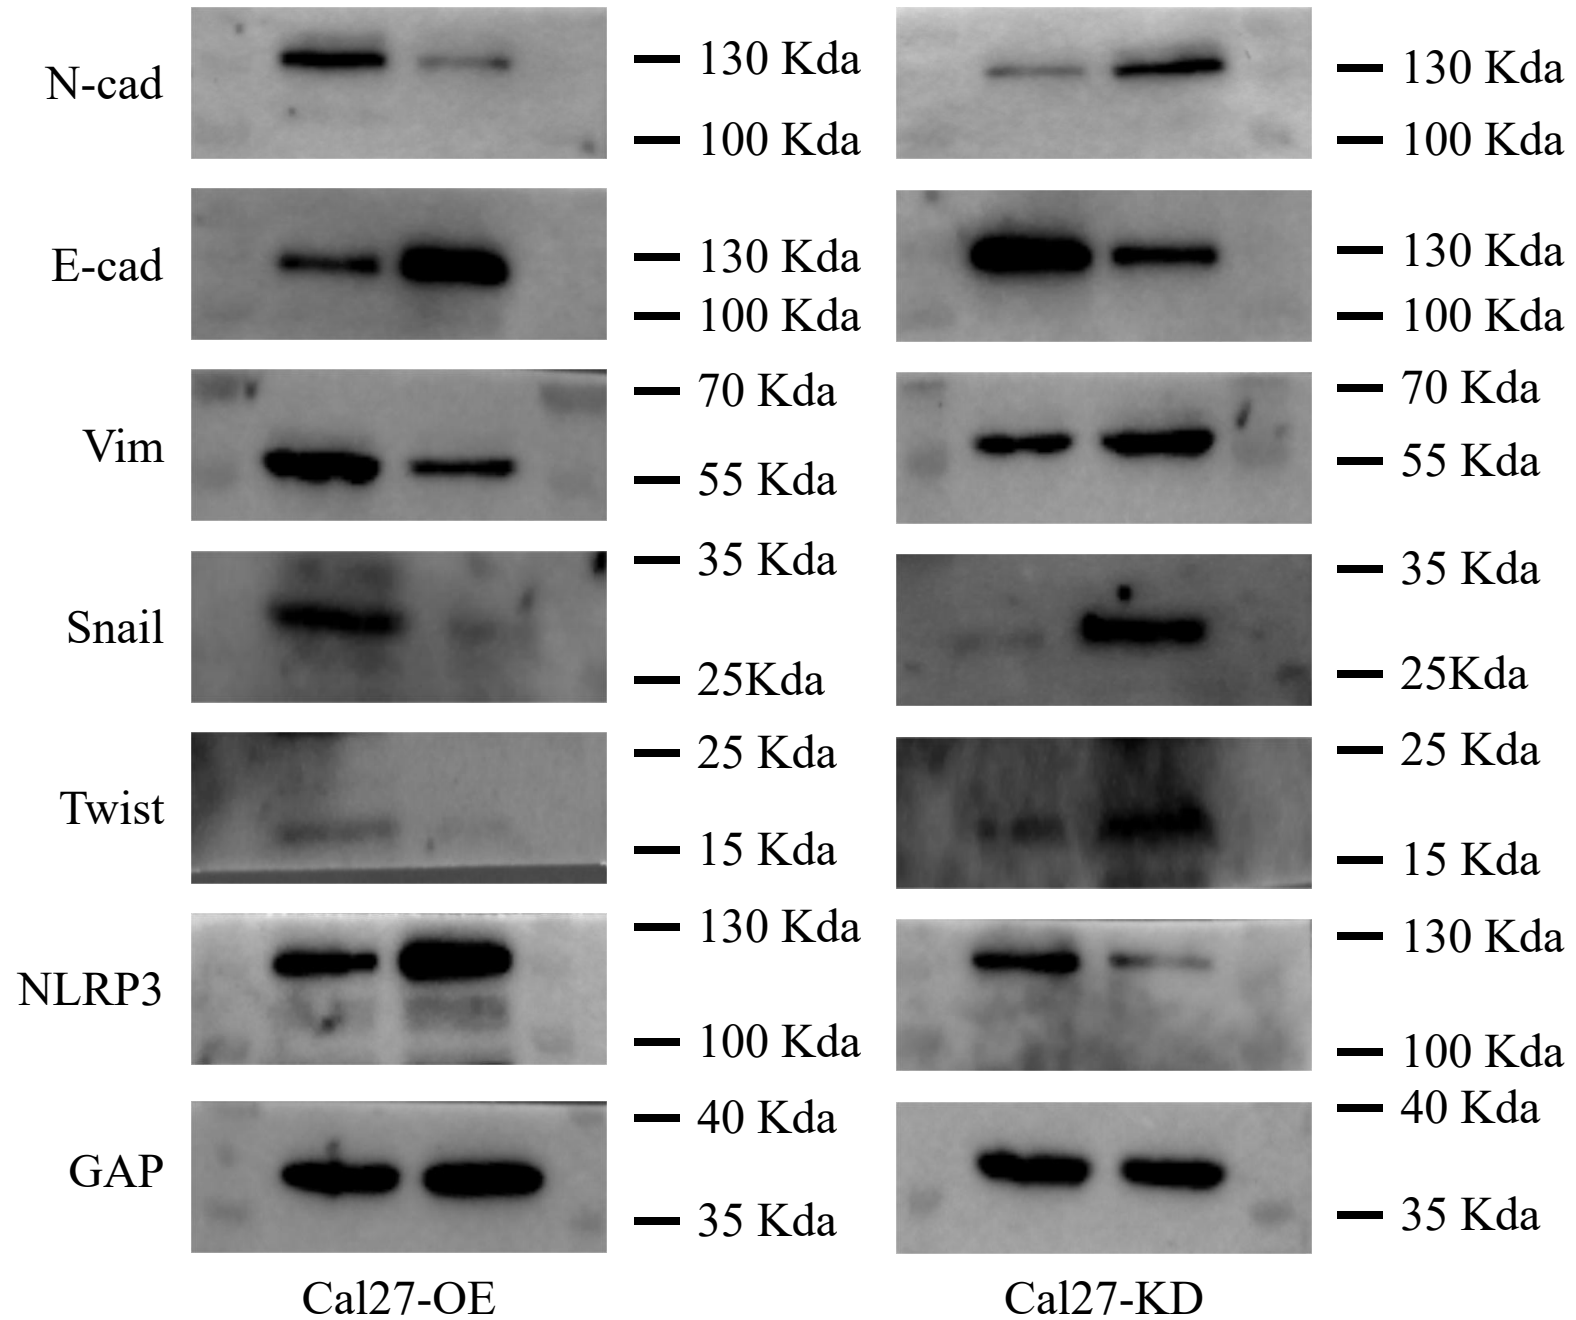

**Figure 6A-HN6**

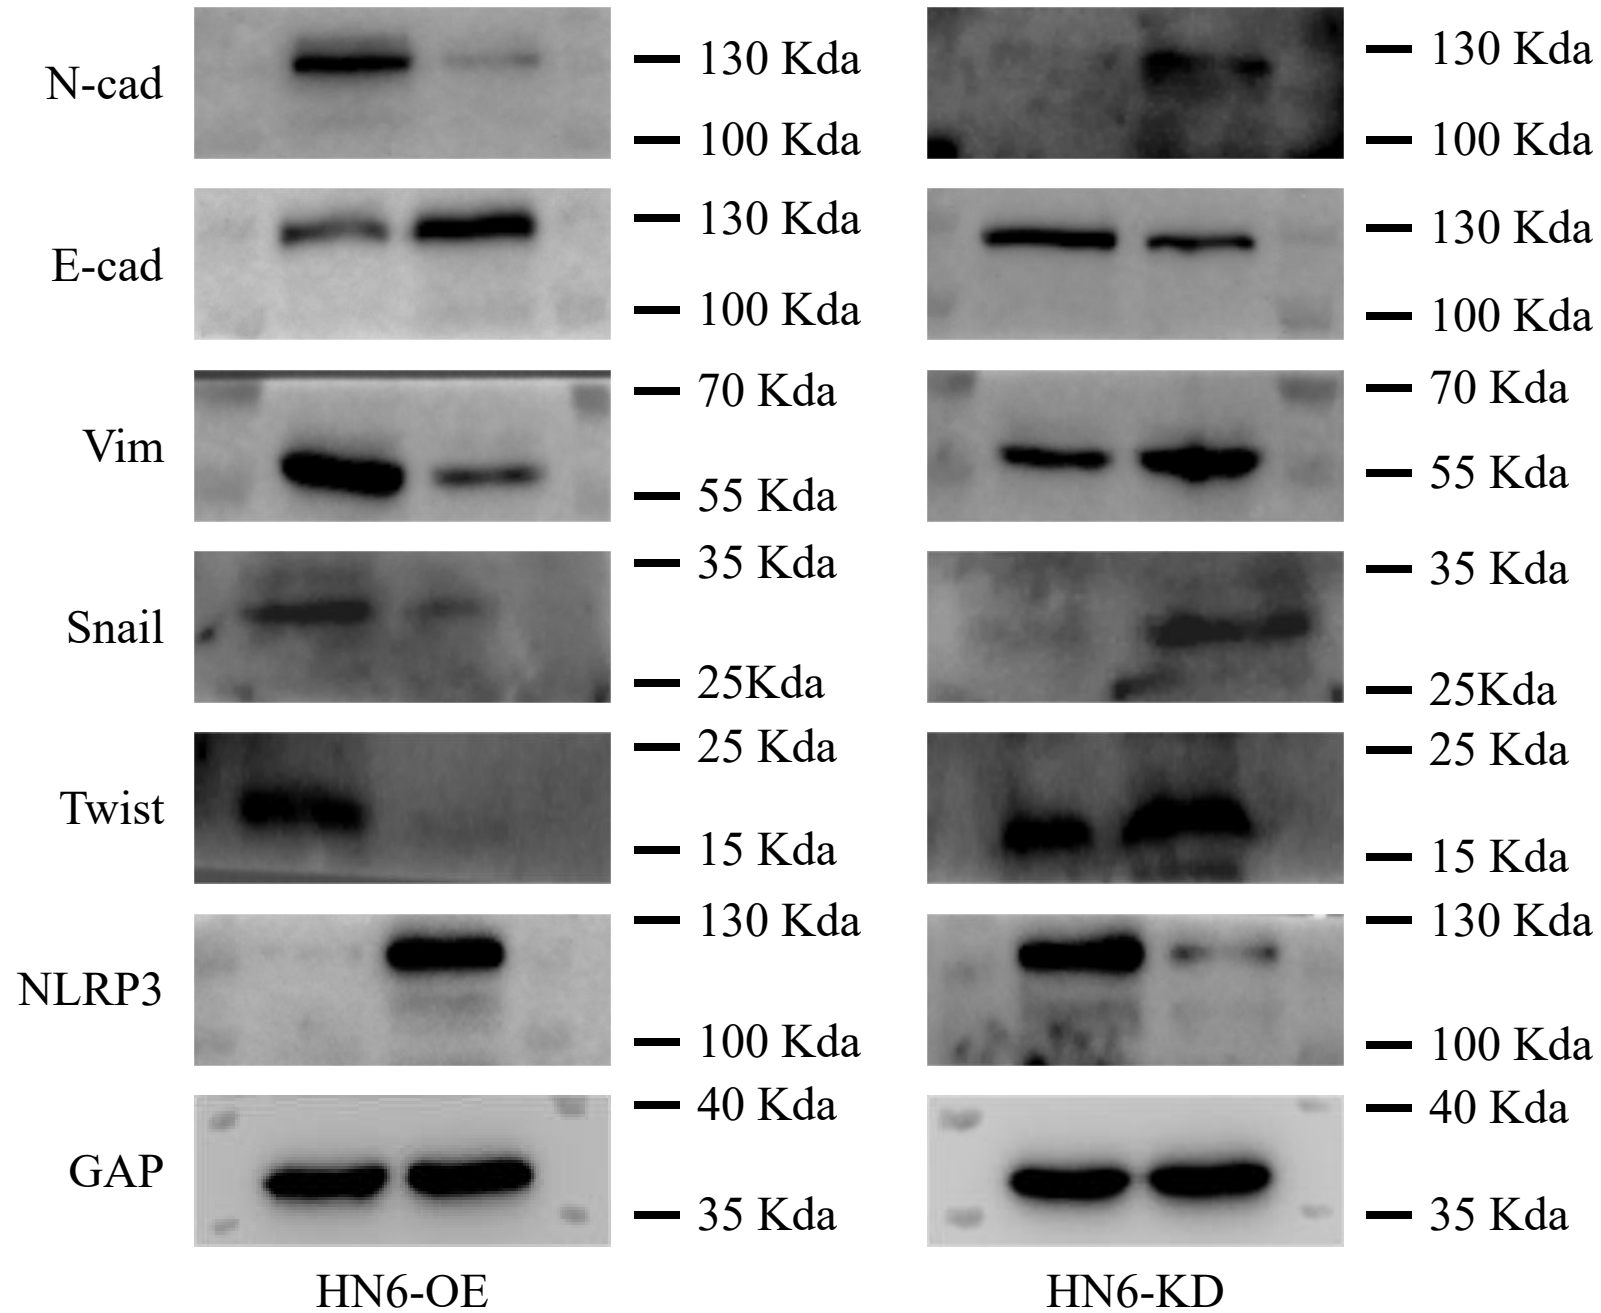

**Figure 8A-Cal27**

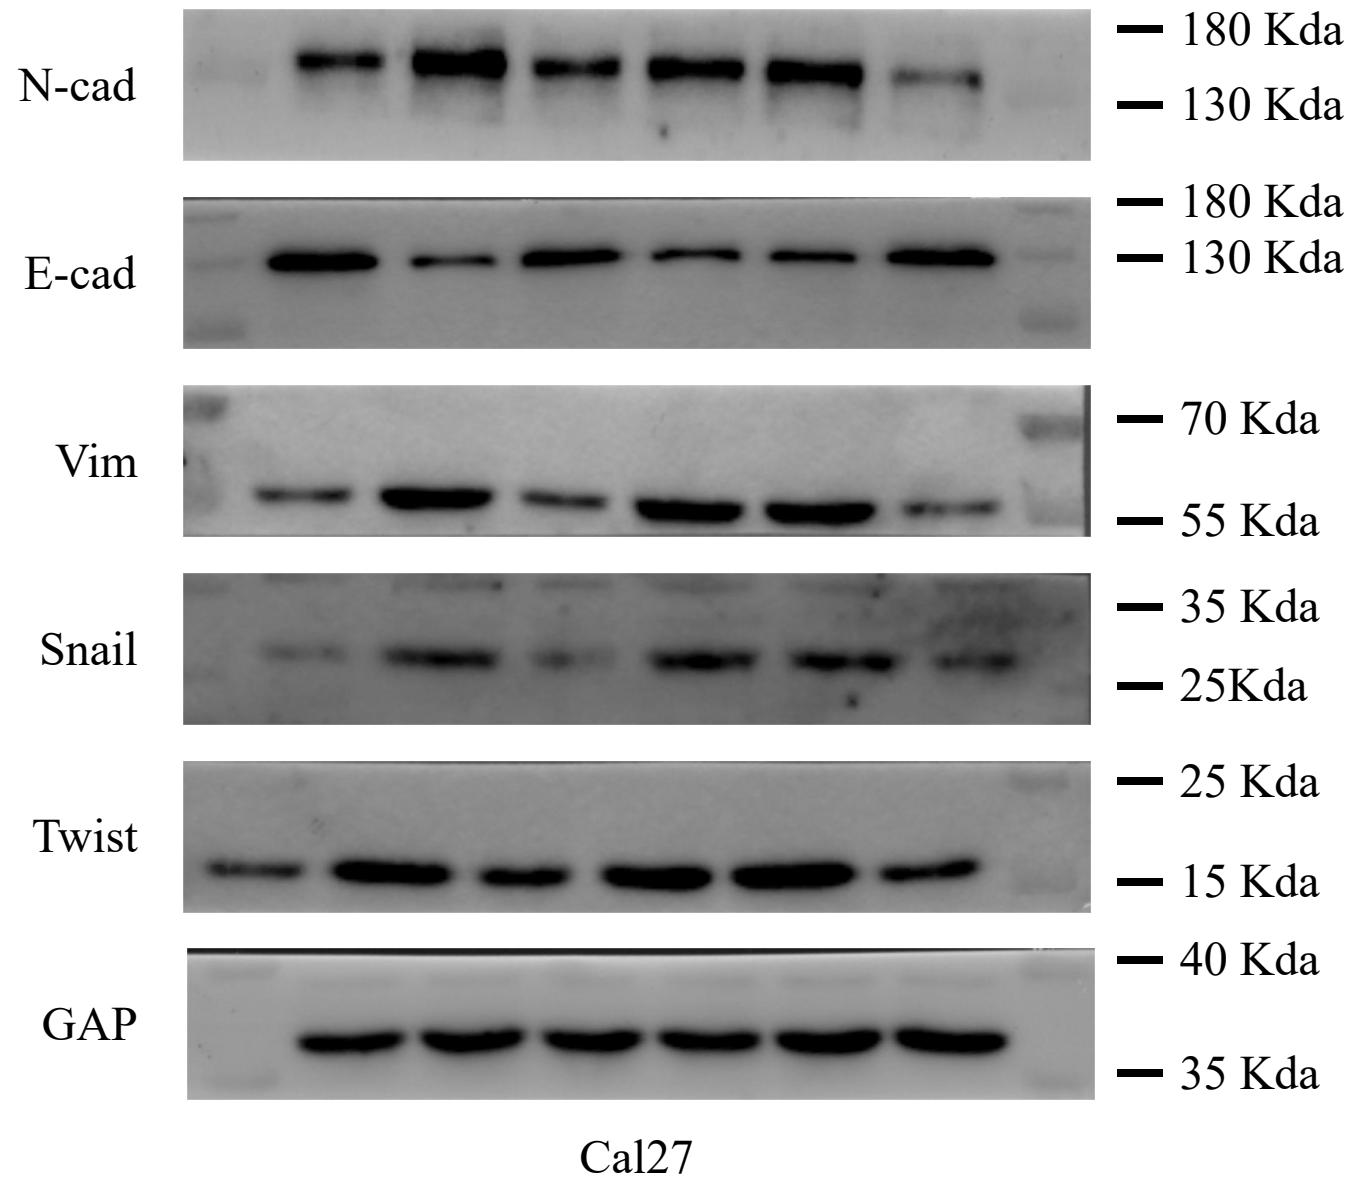

**Figure 8A-HN6**

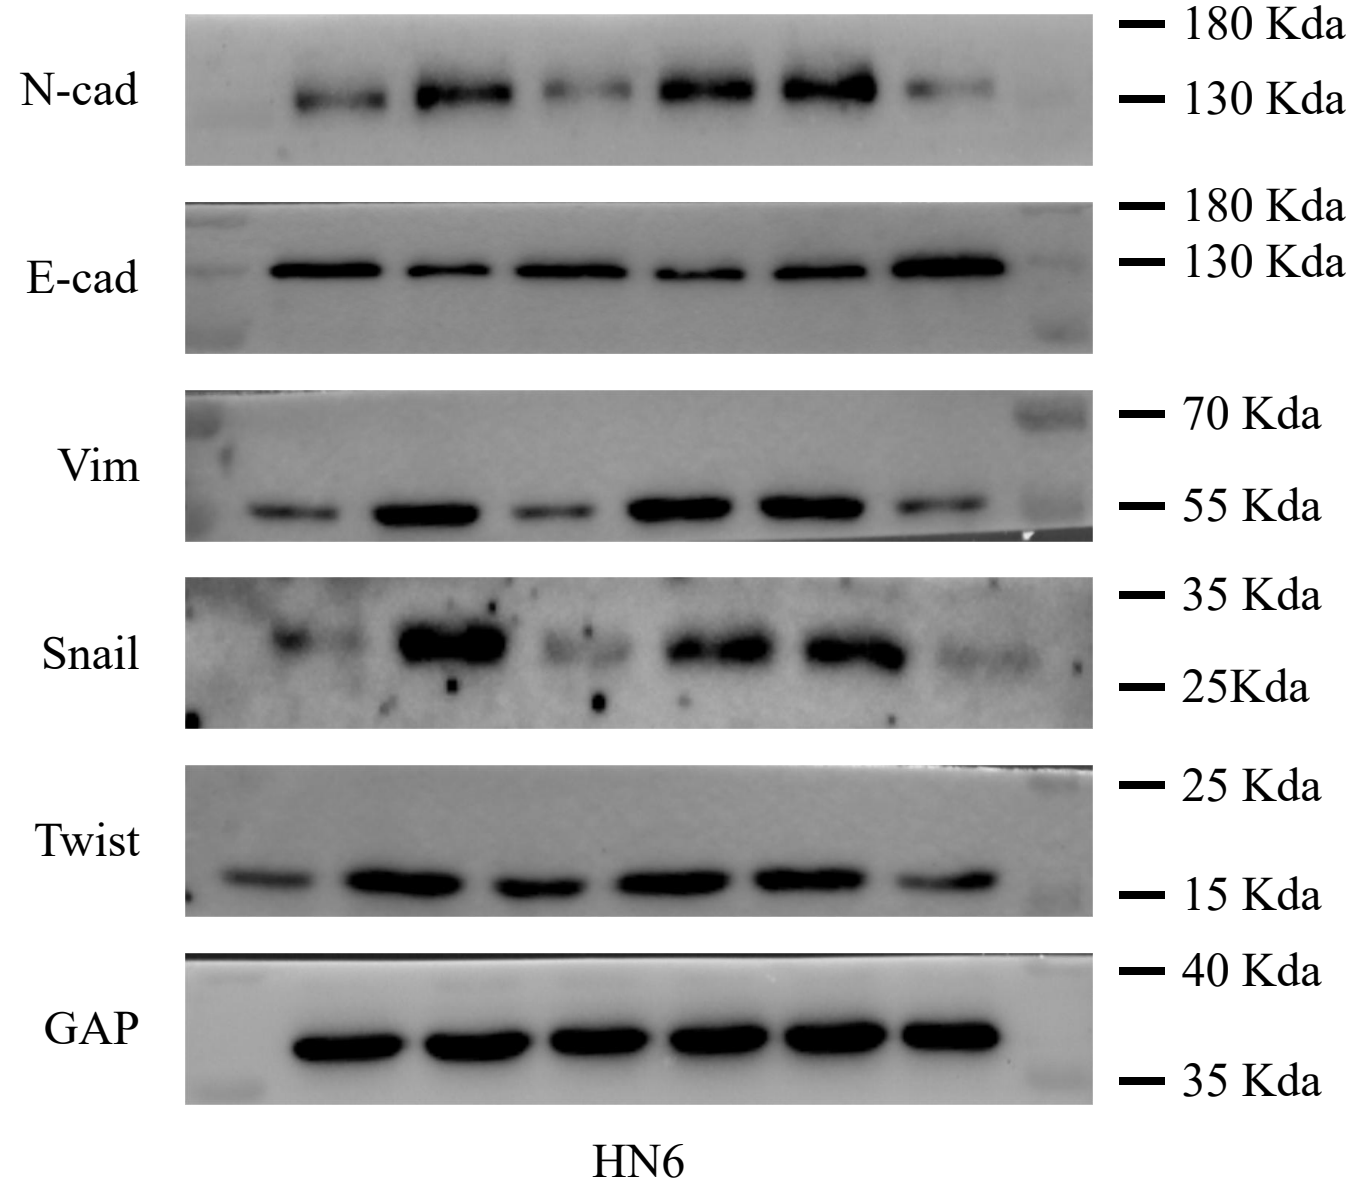





**Figure 8B-HN6**

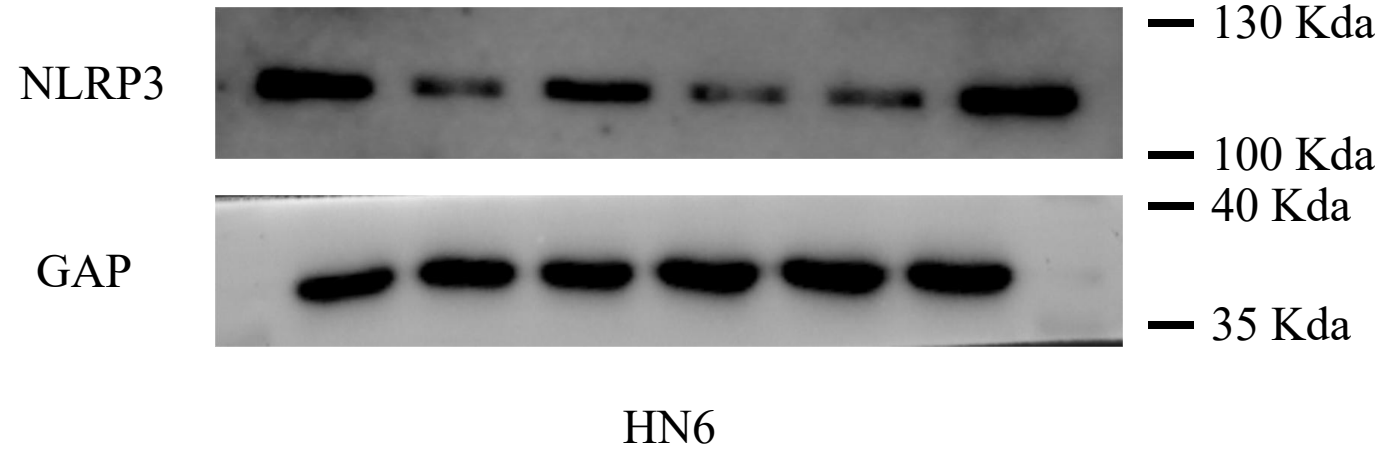

# Supplementary Figure 3-Cal27

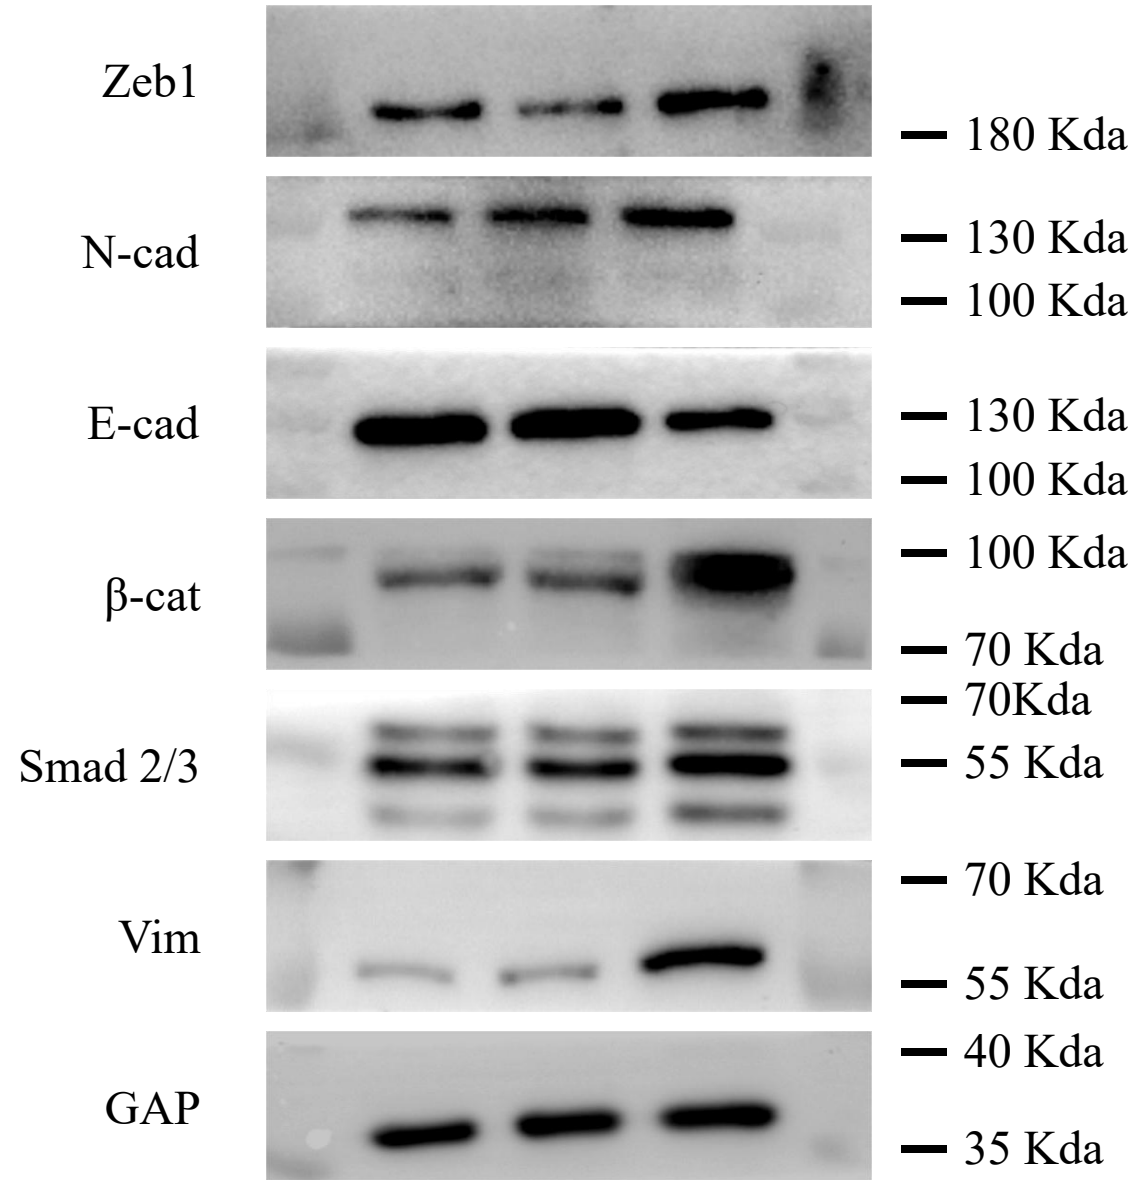

Cal27

# Supplementary Figure 3-HN6

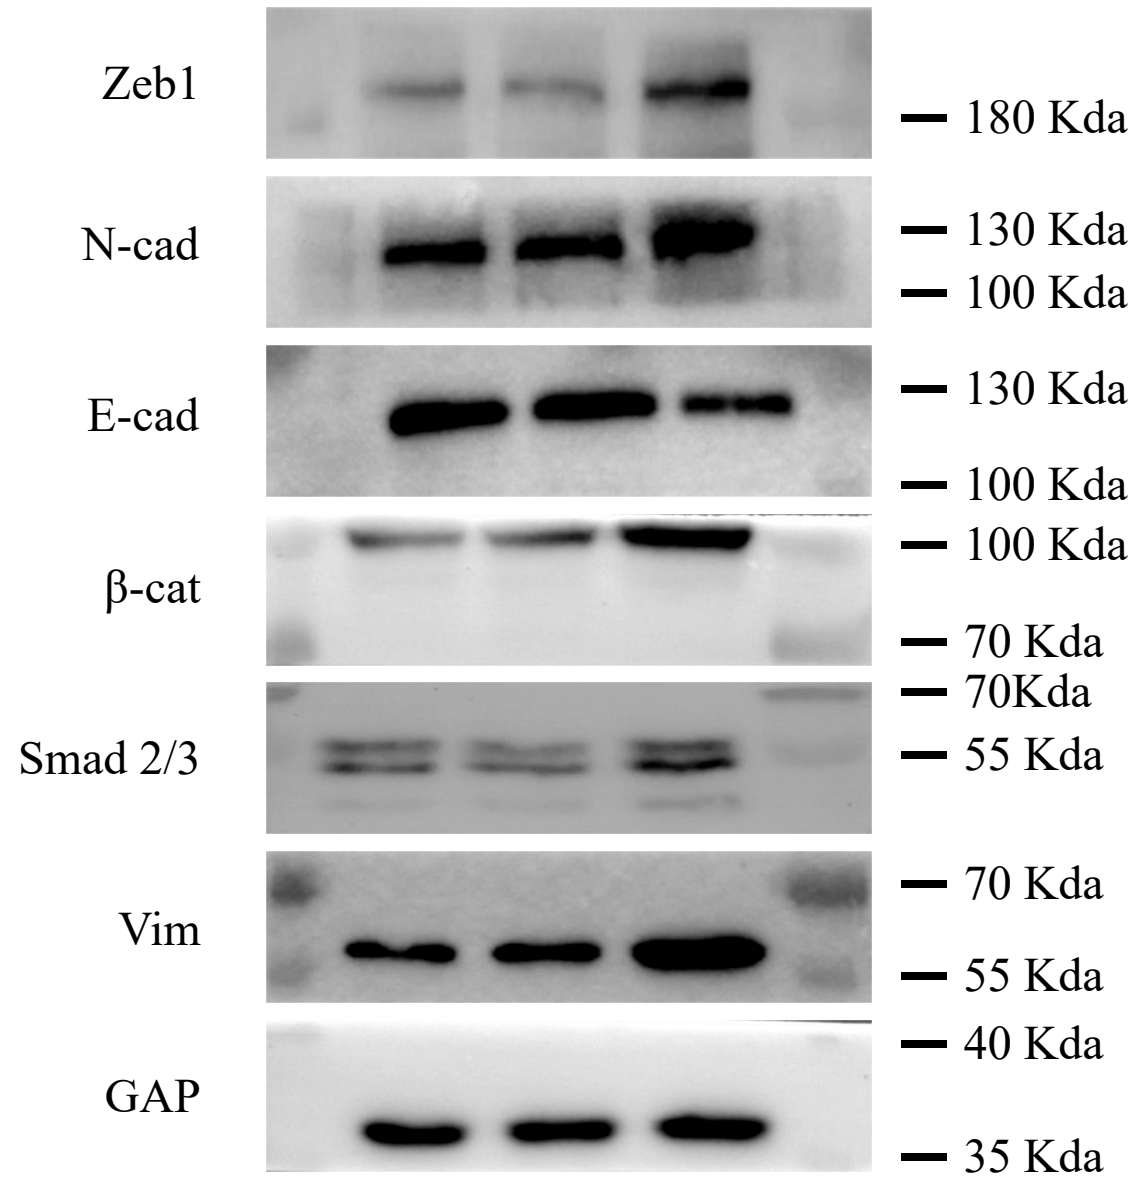

HN6

# Supplementary Figure 3-Fadu

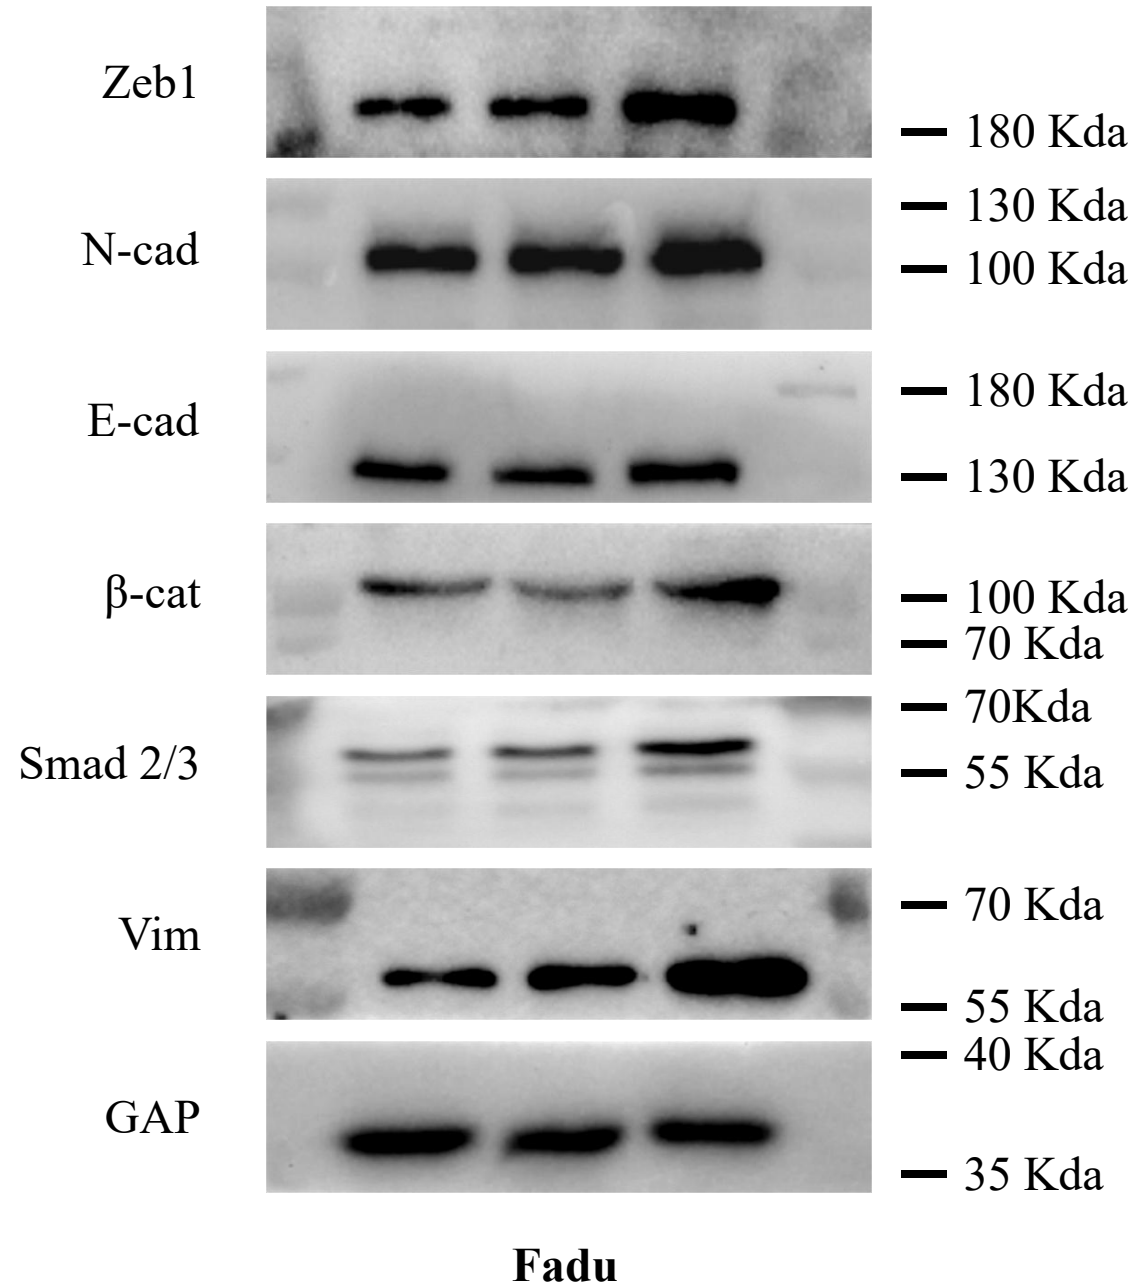

# Supplementary Figure 3-HN4

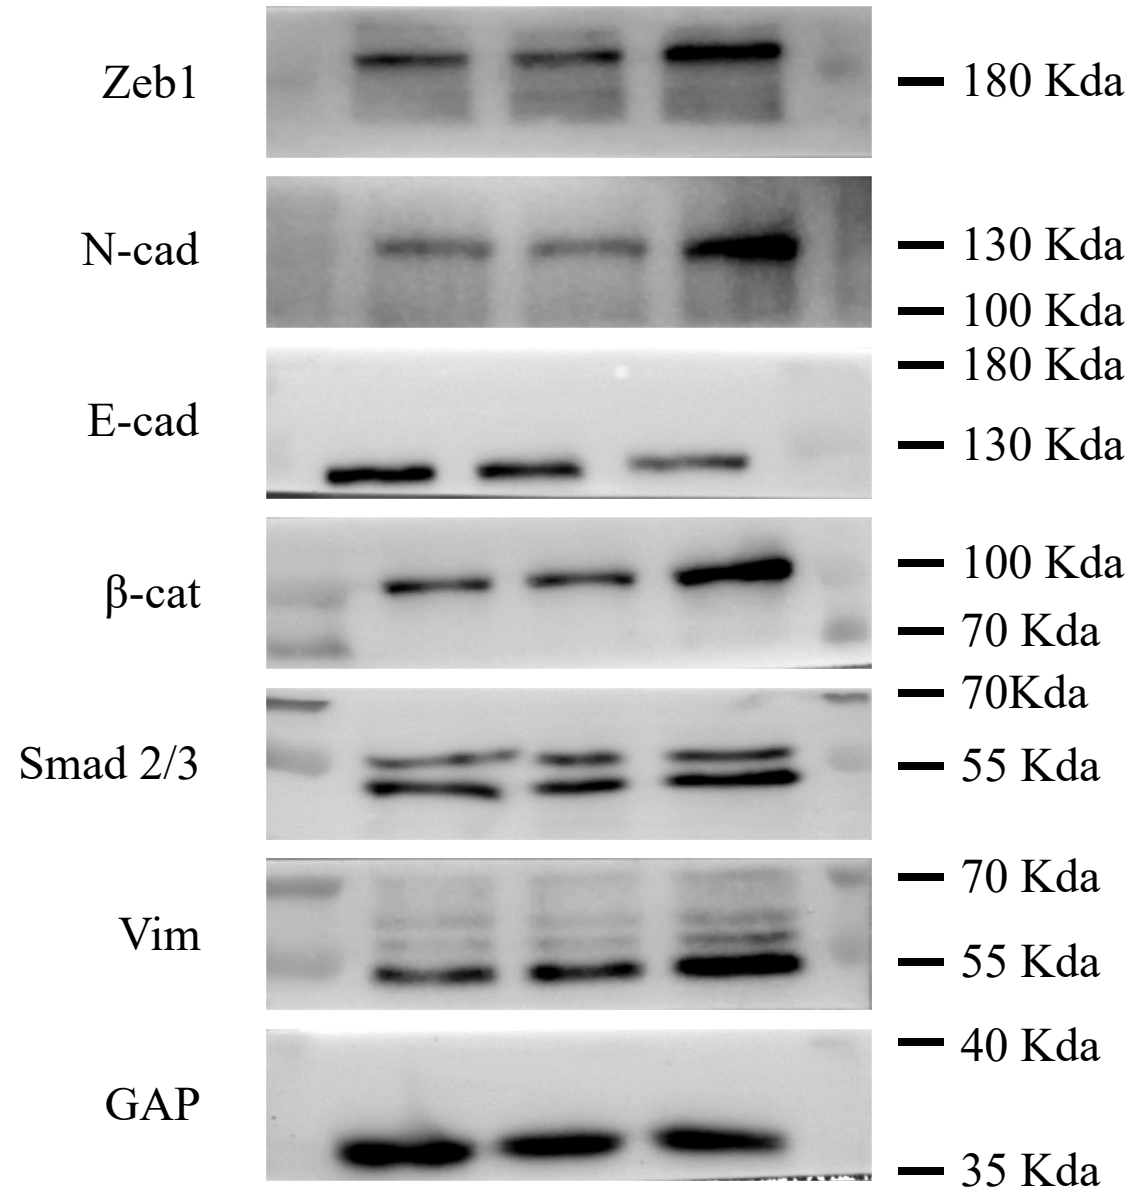

HN4

# Supplementary Figure 3-HN30

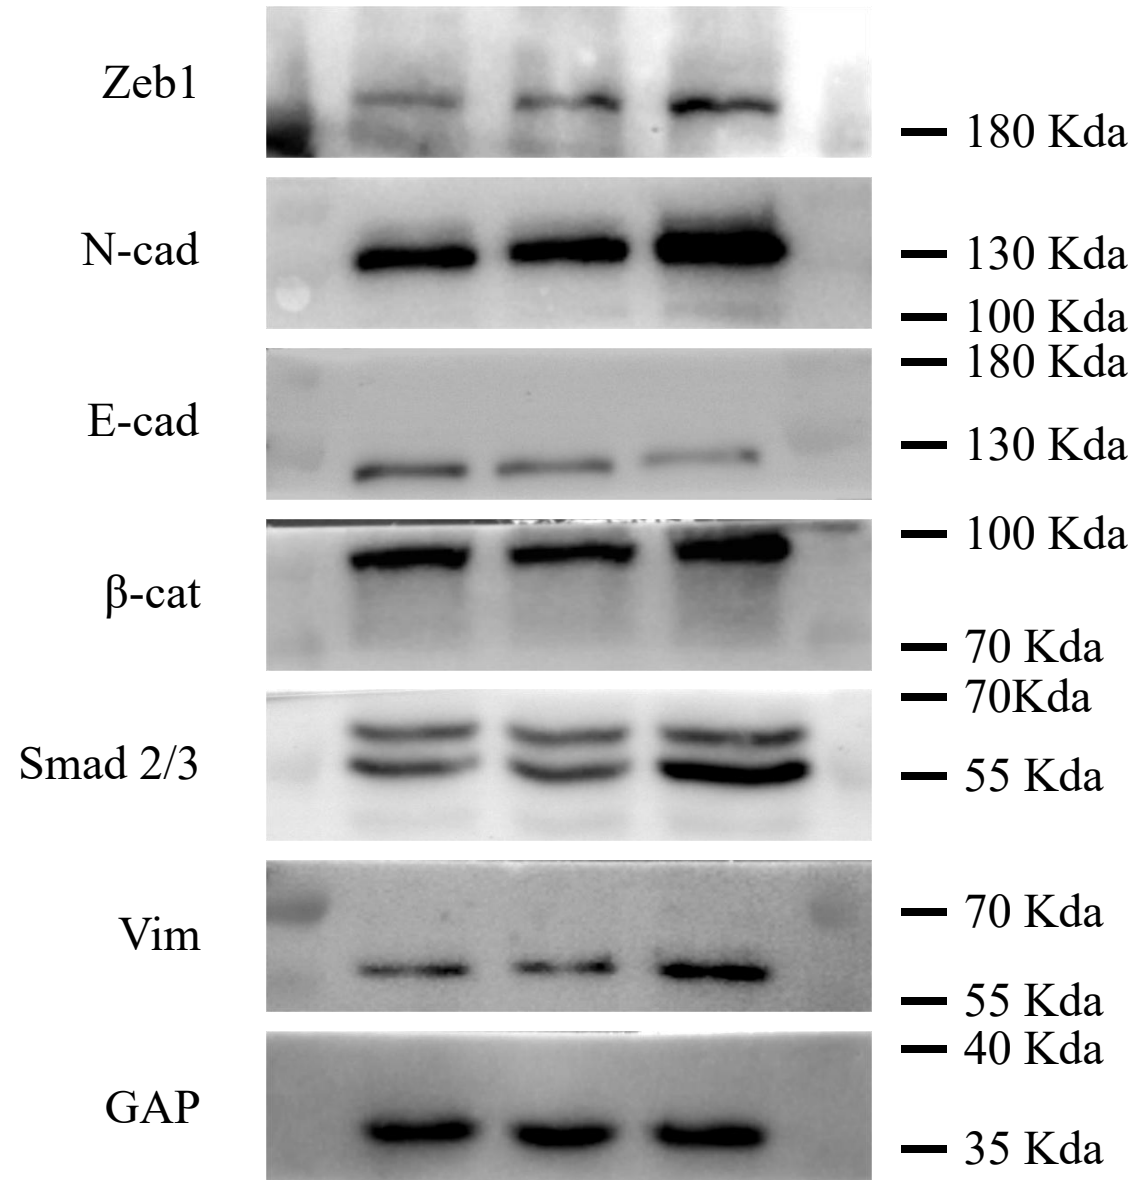

HN30

# Supplementary Figure 3-HSC3

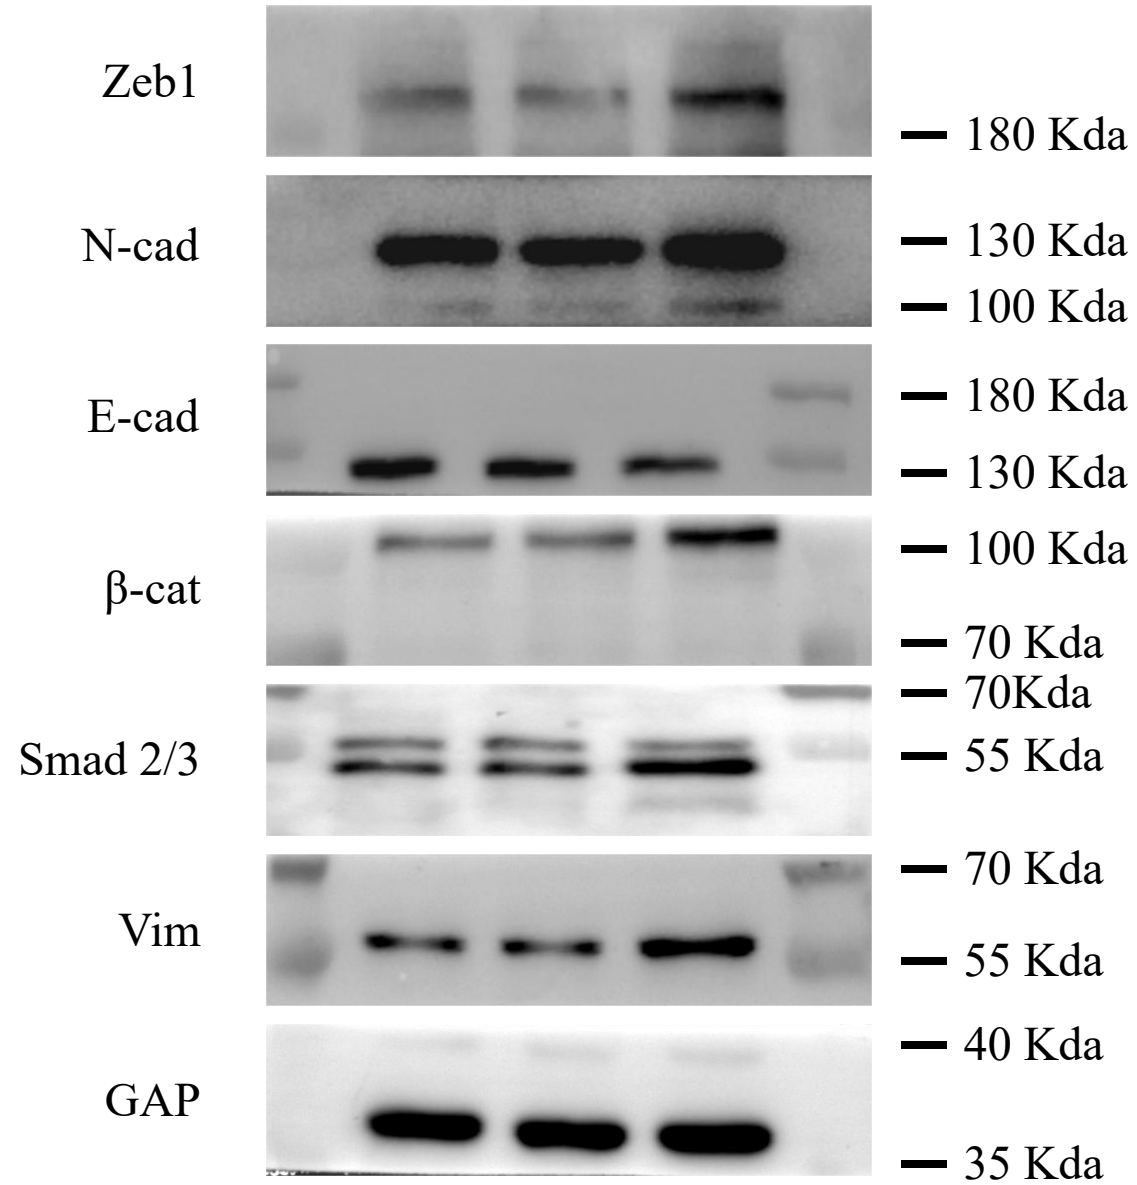

HSC3



# Supplementary Figure 3-SCC4

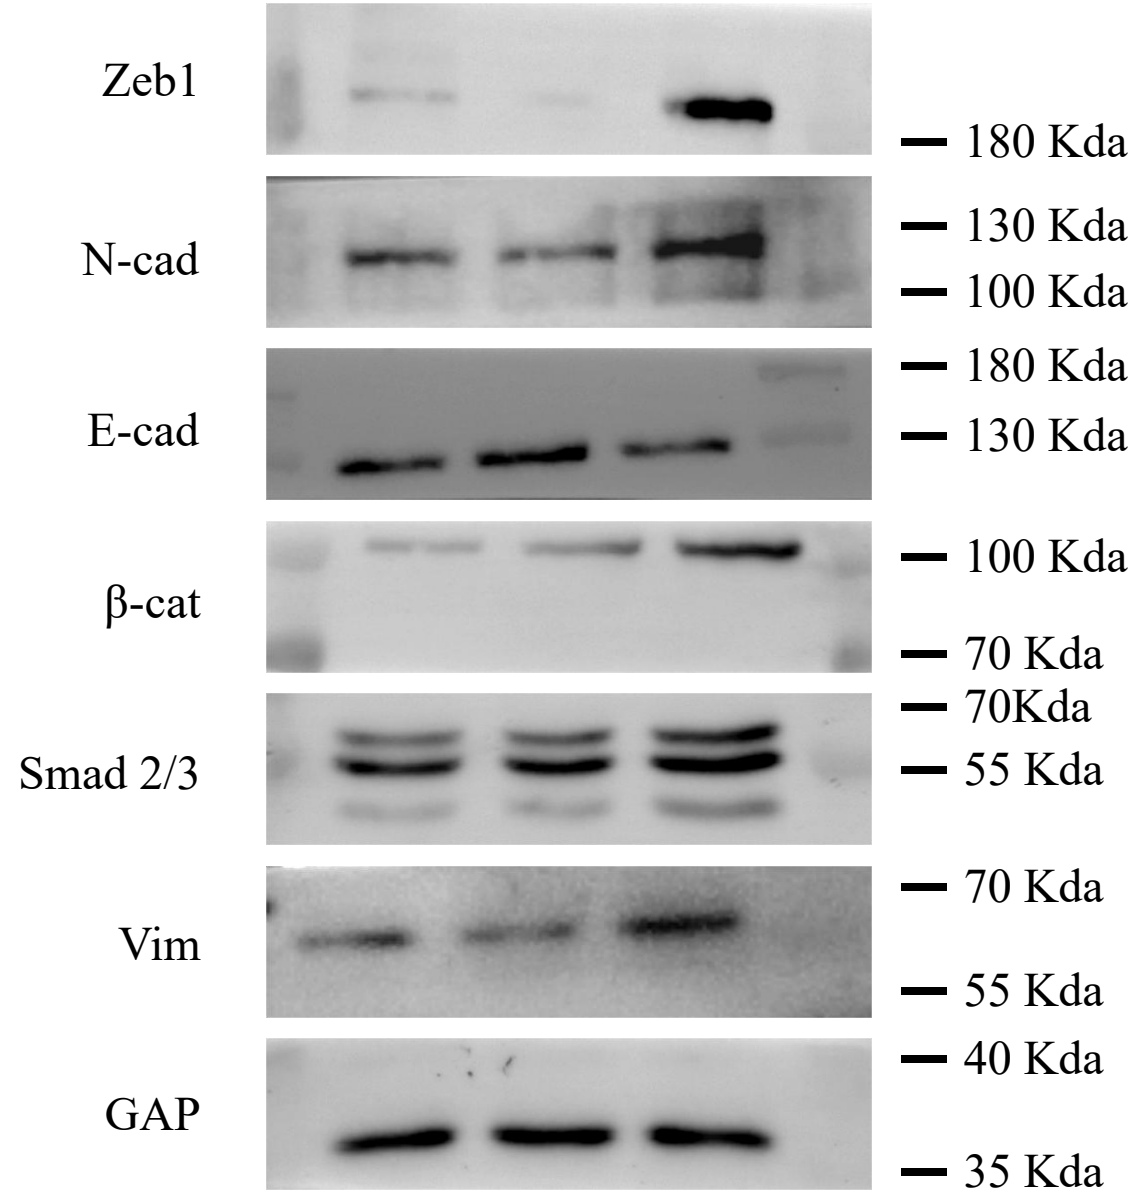

SCC4

# Supplementary Figure 3-SCC9

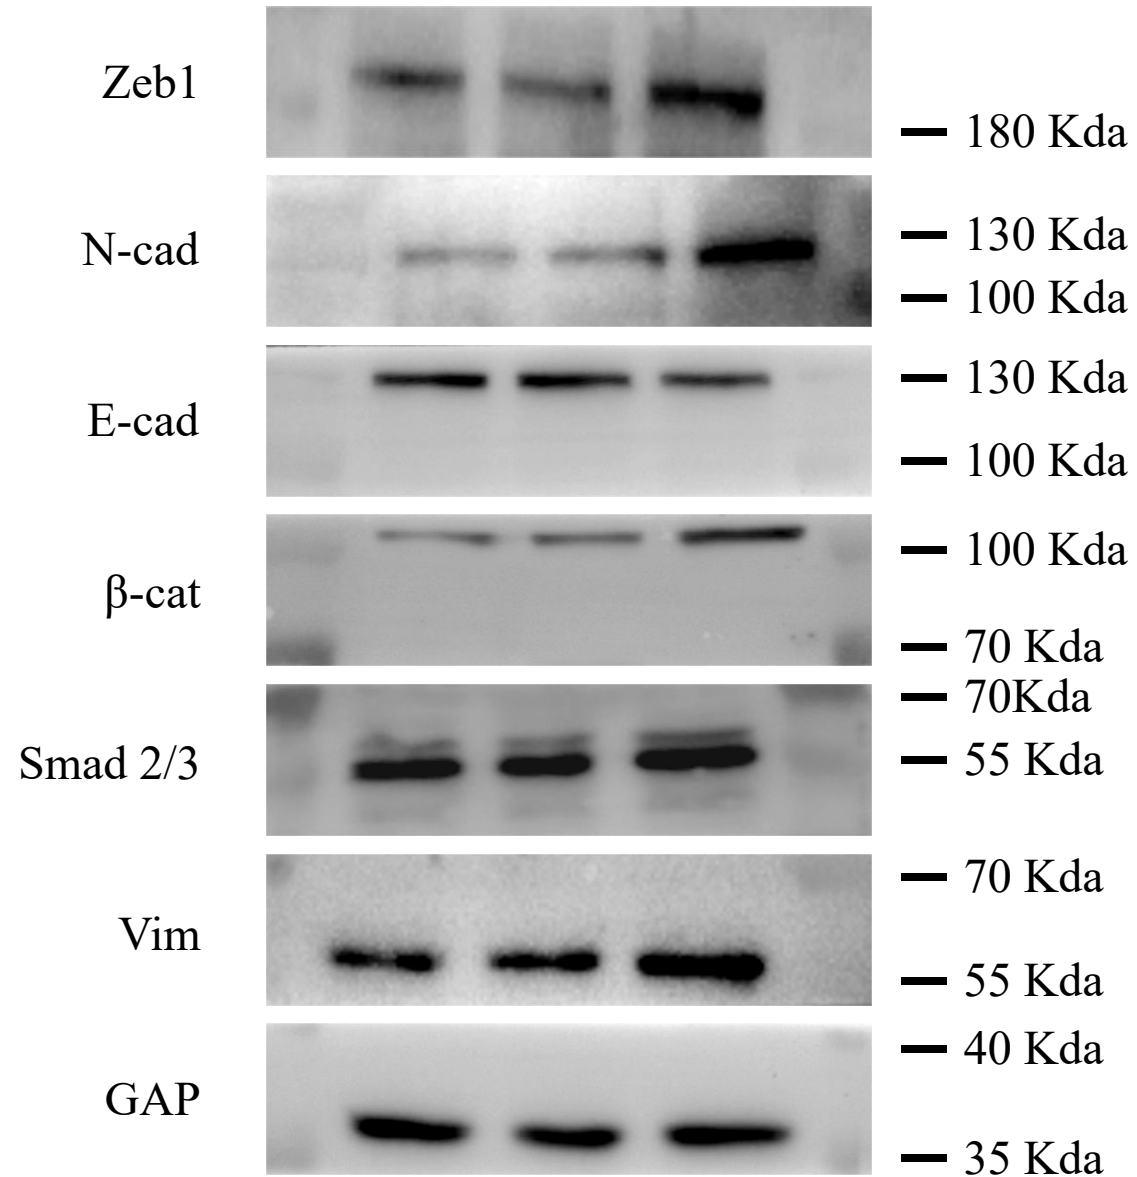

SCC9

# Supplementary Figure 3-SCC25

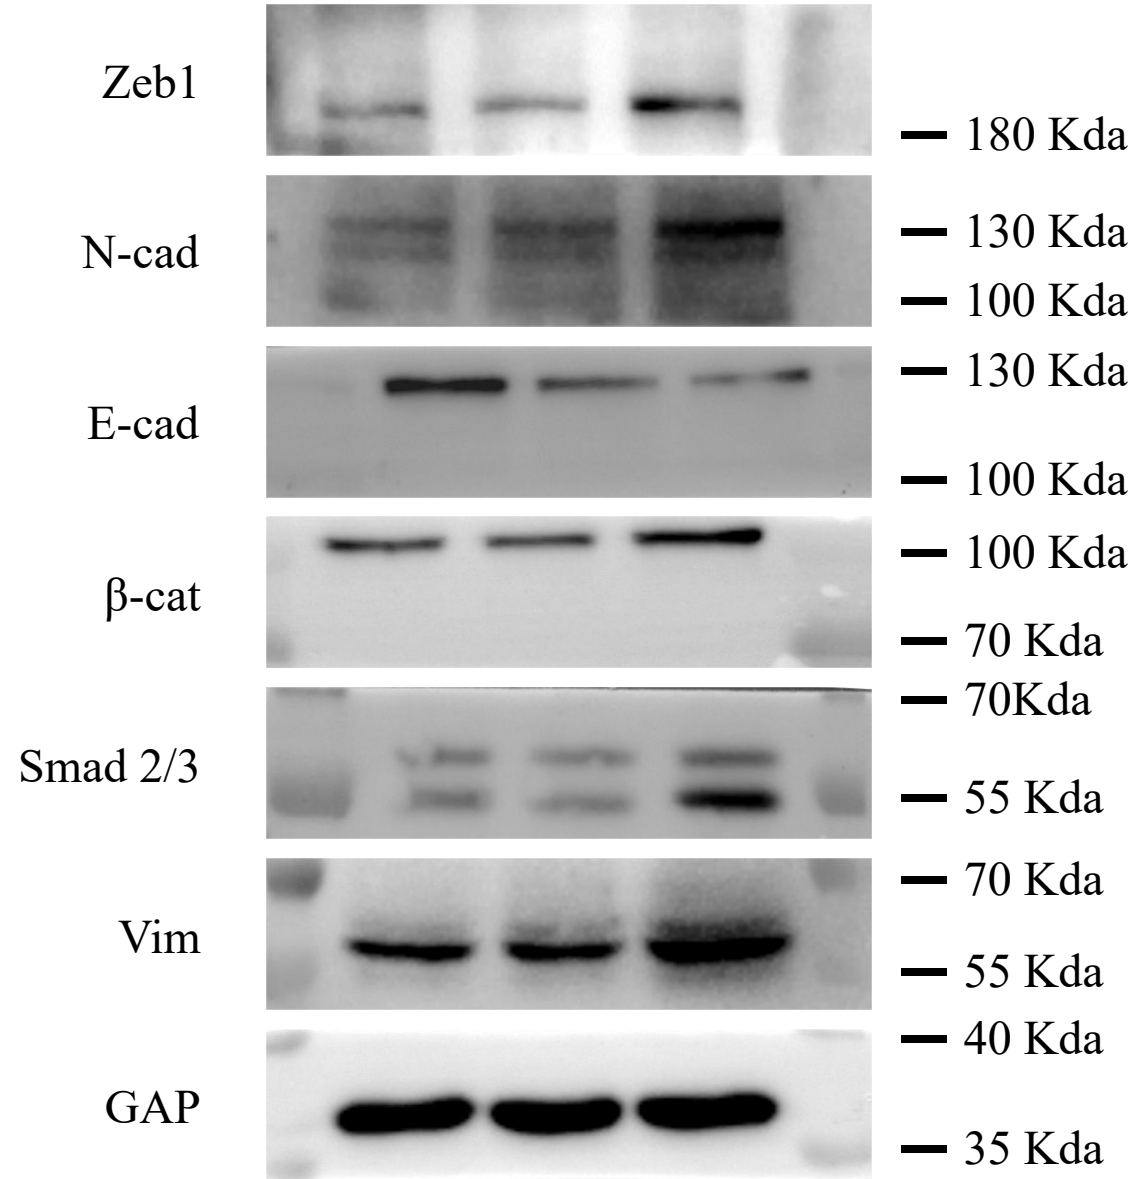

**SCC25**

**Supplementary Figure 5A**

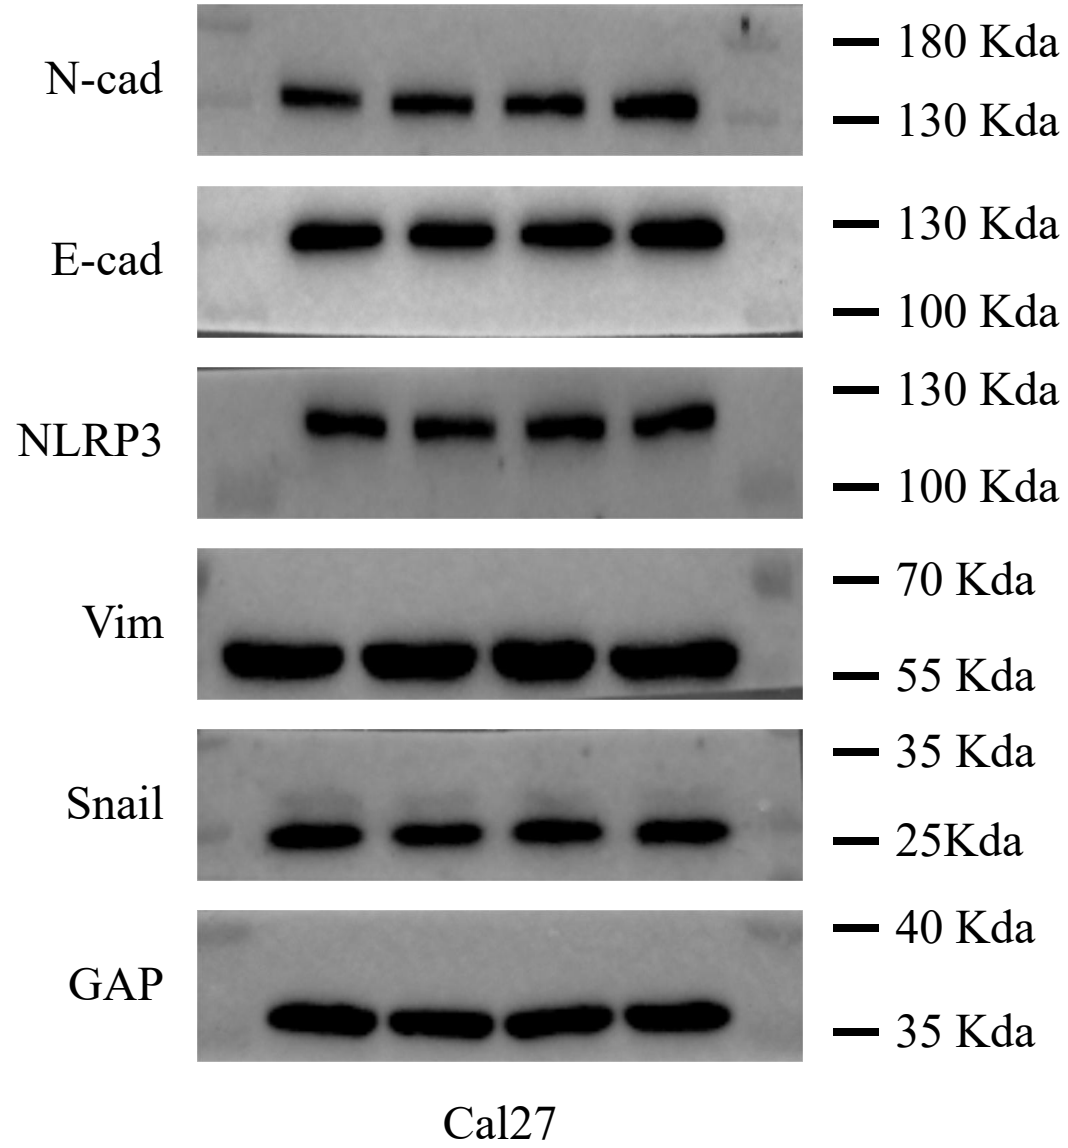

# Supplementary Figure 5B

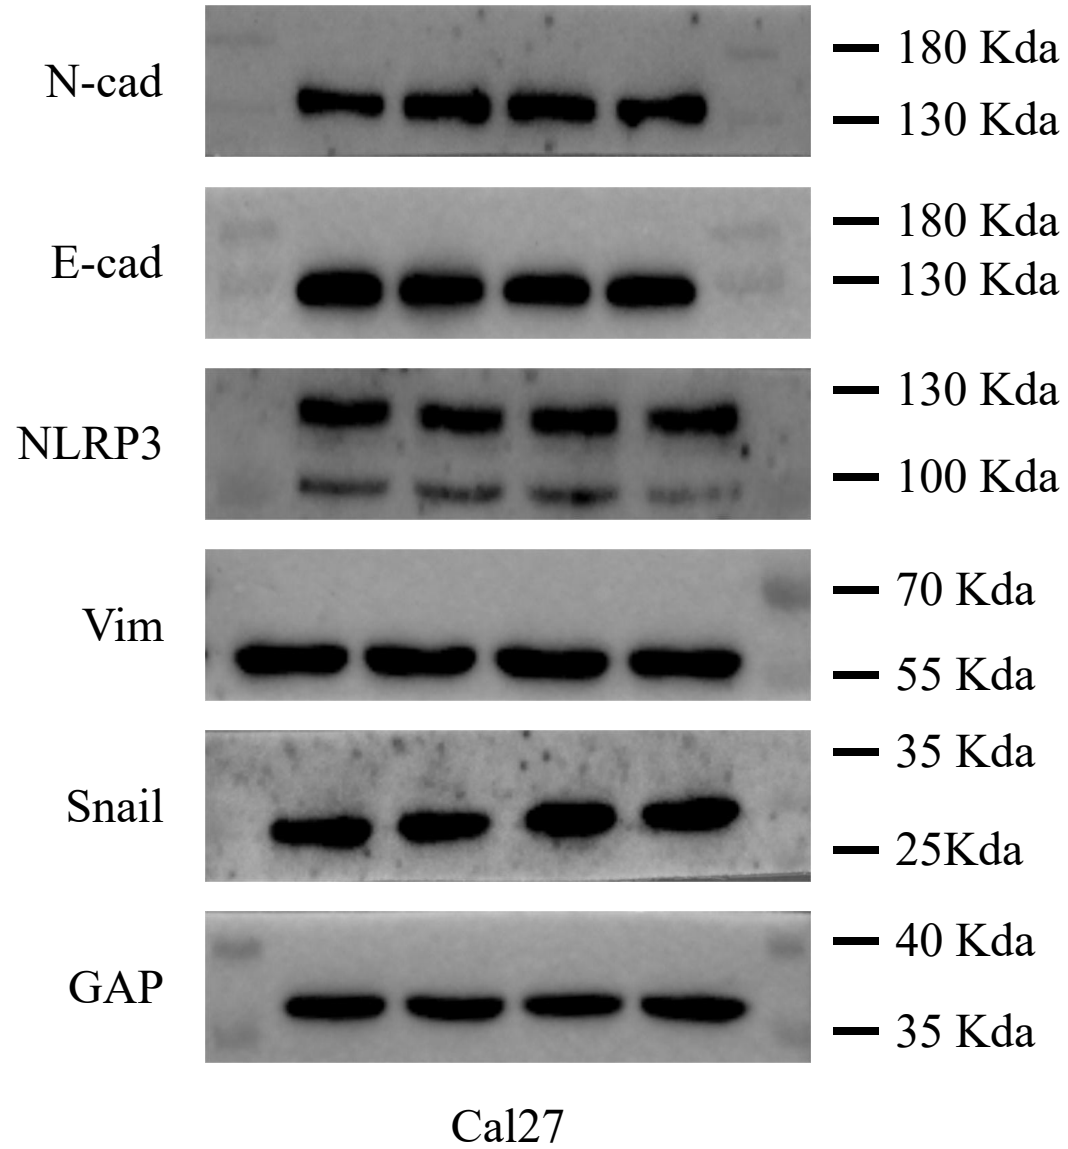

Supplement: 41420_2024_1982_MOESM2_ESM.pdf [file 41420_2024_1982_MOESM2_ESM.pdf]
